# Supplementary material for: Alteration of metabolite profiling by cold atmospheric plasma treatment in human myeloma cells
Source: Cancer Cell Int. 2018 Mar 20;18:42. doi: 10.1186/s12935-018-0541-z (PMC5859683; doi:10.1186/s12935-018-0541-z)
Supplement: Supplementary file 1 — Additional file 1: Table S1. KEGG metabolite mapping. [file 12935_2018_541_MOESM1_ESM.xlsx]

## Sheet: Metabolite Mapping
id	Peak	KEGG COMPOUND name	KEGG COMPOUND ID	PubChem	CAS	NIKKAJI	ChEBI	HMDB	Formula	Exact Mass	Kingdom	Super Class	Class	Sub Class	KEGG Link	Pathway
37	lactic acid	lactic acid	C01432	612	50-21-5	J1.358G	28358		C3H6O3	90.0317					http://www.kegg.jp/dbget-bin/www_bget?cpd:C01432
45	2-ketobutyric acid 2	2-ketobutyric acid	C00109	58	600-18-0	J2.726J	30831	HMDB00005	C4H6O3	102.032	Organic compounds	Organic acids and derivatives	Keto acids and derivatives	Short-chain keto acids and derivatives	http://www.kegg.jp/dbget-bin/www_bget?cpd:C00109	map00260 Glycine, serine and threonine metabolism;map00270 Cysteine and methionine metabolism;map00290 Valine, leucine and isoleucine biosynthesis;map00640 Propanoate metabolism;map00660 C5-Branched dibasic acid metabolism;map01100 Metabolic pathways;map01110 Biosynthesis of secondary metabolites;map01130 Biosynthesis of antibiotics;map01210 2-Oxocarboxylic acid metabolism;map01230 Biosynthesis o…
48	glycolic acid	glycolic acid	C03547	757	79-14-1	J1.494J	17497	HMDB00115	C2H4O3	76.016	Organic compounds	Organic acids and derivatives	Hydroxy acids and derivatives	Alpha hydroxy acids and derivatives	http://www.kegg.jp/dbget-bin/www_bget?cpd:C00160	map00361 Chlorocyclohexane and chlorobenzene degradation;map00625 Chloroalkane and chloroalkene degradation;map00630 Glyoxylate and dicarboxylate metabolism;map01100 Metabolic pathways;map01110 Biosynthesis of secondary metabolites;map01120 Microbial metabolism in diverse environments;map01130 Biosynthesis of antibiotics;map01200 Carbon metabolism
59	alanine 1	alanine	C01401	602	56-41-7	J44.439A	164493		C3H7NO2	89.0477					http://www.kegg.jp/dbget-bin/www_bget?cpd:C01401	map00460 Cyanoamino acid metabolism
63	2-hydroxybutanoic acid	2-Hydroxybutanoic acid	C05984	440864	565-70-8	J57.683B	1148	HMDB00008	C4H8O3	104.047	Organic compounds	Lipids and lipid-like molecules	Fatty Acyls	Fatty acids and conjugates	http://www.kegg.jp/dbget-bin/www_bget?cpd:C05984	map00640 Propanoate metabolism
67	sarcosine	sarcosine	C00213	1088	107-97-1	J5.067I	15611	HMDB00271	C3H7NO2	89.0477	Organic compounds	Organic acids and derivatives	Carboxylic acids and derivatives	Amino acids, peptides, and alogues	http://www.kegg.jp/dbget-bin/www_bget?cpd:C00213	map00260 Glycine, serine and threonine metabolism;map00330 Arginine and proline metabolism;map01100 Metabolic pathways
68	oxalic acid	oxalic acid	C00209	971	144-62-7	J2.954H	16995	HMDB02329	C2H2O4	89.9953	Organic compounds	Organic acids and derivatives	Carboxylic acids and derivatives	Dicarboxylic acids and derivatives	http://www.kegg.jp/dbget-bin/www_bget?cpd:C00209	map00625 Chloroalkane and chloroalkene degradation;map00630 Glyoxylate and dicarboxylate metabolism;map01100 Metabolic pathways;map01120 Microbial metabolism in diverse environments
73	3-Hydroxypropionic acid 1	3-Hydroxypropionic acid	C01013	68152	503-66-2	J6.213H	33404	HMDB00700	C3H6O3	90.0317	Organic compounds	Organic acids and derivatives	Hydroxy acids and derivatives	Beta hydroxy acids and derivatives	http://www.kegg.jp/dbget-bin/www_bget?cpd:C01013	map00240 Pyrimidine metabolism;map00410 beta-Alanine metabolism;map00640 Propanoate metabolism;map00720 Carbon fixation pathways in prokaryotes;map01100 Metabolic pathways;map01120 Microbial metabolism in diverse environments;map01200 Carbon metabolism
74	2-Ketovaleric acid 2	alpha-Ketovaleric acid	C06255	74563	1821-02-9	J150.812A	33033	HMDB01865	C5H8O3	116.047	Organic Compounds	Organic Acids and Derivatives	Keto-Acids and Derivatives	Short-chain Keto Acids and Derivatives	http://www.genome.jp/dbget-bin/www_bget?cpd:C06255
78	4-HYDROXYPYRIDINE	4-HYDROXYPYRIDINE		12290	626-64-2
79	3-hydroxybutyric acid			441	306-31-0											NA;map00410 beta-Alanine metabolism;map00640 Propanoate metabolism;map00720 Carbon fixation pathways in prokaryotes;map01100 Metabolic pathways;map01120 Microbial metabolism in diverse environments;map01200 Carbon metabolism
80	4-aminobutyric acid 3	4-aminobutyric acid	C00334	119	56-12-2	J1.375G	16865	HMDB00112	C4H9NO2	103.063	Organic compounds	Organic acids and derivatives	Carboxylic acids and derivatives	Amino acids, peptides, and alogues	http://www.kegg.jp/dbget-bin/www_bget?cpd:C00334	map00250 Alanine, aspartate and glutamate metabolism;map00330 Arginine and proline metabolism;map00410 beta-Alanine metabolism;map00650 Butanoate metabolism;map00760 Nicotite and nicotimide metabolism;map01100 Metabolic pathways;map01120 Microbial metabolism in diverse environments;map04024 cAMP sigling pathway;map04080 Neuroactive ligand-receptor interaction;map04721 Syptic vesicle cycle;map0472…
83	sulfuric acid	sulfuric acid	C00059	1118	7664-93-9	J3.749D	16189		H2SO4	97.9674					http://www.kegg.jp/dbget-bin/www_bget?cpd:C00059	map00230 Purine metabolism;map00261 Monobactam biosynthesis;map00270 Cysteine and methionine metabolism;map00920 Sulfur metabolism;map01100 Metabolic pathways;map01120 Microbial metabolism in diverse environments;map01130 Biosynthesis of antibiotics;map02010 ABC transporters
85	N-Methyl-DL-alanine			4377	600-21-5
86	Methyl Phosphate			13130	812-00-0
87	alpha-ketoisocaproic acid 2	4-Methyl-2-oxopentanoate	C00233	70	816-66-0	J39.557I	48430	HMDB00695	C6H10O3	130.063	Organic Compounds	Organic acids and derivatives	Keto acids and derivatives	Short-chain keto acids and derivatives	http://www.genome.jp/dbget-bin/www_bget?cpd:C00233	map00280 Valine, leucine and isoleucine degradation ;map00290 Valine, leucine and isoleucine biosynthesis ;map00966 Glucosinolate biosynthesis ;map01100 Metabolic pathways ;map01110 Biosynthesis of secondary metabolites ;map01210 2-Oxocarboxylic acid metabolism ;map01230 Biosynthesis of amino acids
92	beta-Alanine 1	beta-Alanine	C00099	239	107-95-9	J4.070C	16958	HMDB00056	C3H7NO2	89.0477	Organic compounds	Organic acids and derivatives	Carboxylic acids and derivatives	Amino acids, peptides, and alogues	http://www.kegg.jp/dbget-bin/www_bget?cpd:C00099	map00240 Pyrimidine metabolism;map00410 beta-Alanine metabolism;map00640 Propanoate metabolism;map00770 Pantothete and CoA biosynthesis;map01100 Metabolic pathways;map01110 Biosynthesis of secondary metabolites;map04080 Neuroactive ligand-receptor interaction;map04974 Protein digestion and absorption
94	malonic acid 1	malonic acid	C04025	867	141-82-2	J2.541K	30794	HMDB00691	C3H4O4	104.011	Organic compounds	Organic acids and derivatives	Carboxylic acids and derivatives	Dicarboxylic acids and derivatives	http://www.kegg.jp/dbget-bin/www_bget?cpd:C00383	map00240 Pyrimidine metabolism;map00410 beta-Alanine metabolism
95	cycloleucine 2	cycloleucine	C03969	2901	52-52-8	J4.131I	40547		C6H11NO2	129.079					http://www.kegg.jp/dbget-bin/www_bget?cpd:C03969
100	2-Hydroxyvaleric acid	2-Hydroxyvaleric acid		98009	617-31-2		60647	HMDB01863			Organic Compounds	Lipids and lipid-like molecules	Fatty Acyls	Fatty acids and conjugates
102	Methylmalonic acid	Methylmalonic acid	C02170	487	516-05-2	J6.302I	30860	HMDB00202	C02170	118.027	Organic compounds	Organic acids and derivatives	Carboxylic acids and derivatives	Dicarboxylic acids and derivatives	http://www.kegg.jp/dbget-bin/www_bget?cpd:C02170	map00240 Pyrimidine metabolism;map00280 Valine, leucine and isoleucine degradation;map00640 Propanoate metabolism
104	valine	valine	C00183	1182	72-18-4	J44.290I	27266		C5H11NO2	117.079					http://www.kegg.jp/dbget-bin/www_bget?cpd:C16436
106	canavanine degr prod			275	543-38-4
107	2-Butyne-1,4-diol	2-Butyne-1,4-diol	C02497	8066	110-65-6	J5.098I	164133		C4H6O2	86.0368					http://www.kegg.jp/dbget-bin/www_bget?cpd:C02497
109	hydroxyurea	Hydroxyurea	C07044	3657	127-07-1	J2.937H	44423	HMDB15140	CH4N2O2	76.0273	Organic Compounds	Organooxygen compounds			http://www.genome.jp/dbget-bin/www_bget?cpd:C07044	map01130 Biosynthesis of antibiotics
110	4-hydroxybutyrate			3037032	502-85-2
112	norvaline			824	6600-40-4
116	2-ketoadipate 3		C00322	71	689-31-6
117	Dihydroxyacetone	Dihydroxyacetone	C00184	670	62147-49-3	J4.719H	16016	HMDB01882	C3H6O3	90.0317	Organic compounds	Organooxygen compounds	Carbohydrates and carbohydrate conjugates	Monosaccharides	http://www.kegg.jp/dbget-bin/www_bget?cpd:C00184	map00561 Glycerolipid metabolism;map00680 Methane metabolism;map01100 Metabolic pathways;map01120 Microbial metabolism in diverse environments;map01200 Carbon metabolism
120	Carbobenzyloxy-L-leucine degr1		C04335	74840	2018-66-8
123	oxamic acid	oxamic acid	C01444	974	471-47-6	J5.942K	18058		C2H3NO3	89.0113					http://www.kegg.jp/dbget-bin/www_bget?cpd:C01444
125	benzoic acid	benzoic acid	C03096	243	65-85-0	J2.358B	30746	HMDB01870	C7H6O2	122.037	Organic compounds	Benzenoids	Benzene and substituted derivatives	Benzoic acids and derivatives	http://www.kegg.jp/dbget-bin/www_bget?cpd:C00180	map00360 Phenylalanine metabolism;map00362 Benzoate degradation;map00621 Dioxin degradation;map00623 Toluene degradation;map00627 Aminobenzoate degradation;map01063 Biosynthesis of alkaloids derived from shikimate pathway;map01100 Metabolic pathways;map01110 Biosynthesis of secondary metabolites;map01120 Microbial metabolism in diverse environments;map01220 Degradation of aromatic compounds
128	glycerol	glycerol	C00116	753	56-81-5	J1.916J	17754	HMDB00131	C3H8O3	92.0473	Organic compounds	Organooxygen compounds	Carbohydrates and carbohydrate conjugates	Sugar alcohols	http://www.kegg.jp/dbget-bin/www_bget?cpd:C00116	map00040 Pentose and glucurote interconversions;map00052 Galactose metabolism;map00561 Glycerolipid metabolism;map01100 Metabolic pathways;map02010 ABC transporters;map04723 Retrograde endocanbinoid sigling;map04923 Regulation of lipolysis in adipocytes
129	Ethanolamine	Ethanolamine	C00189	700	141-43-5	J2.536D	16000	HMDB00149	C2H7NO	61.0528	Organic compounds	Organonitrogen compounds	Amines	Alkanolamines	http://www.kegg.jp/dbget-bin/www_bget?cpd:C00189	map00440 Phosphote and phosphite metabolism;map00564 Glycerophospholipid metabolism;map01100 Metabolic pathways;map04723 Retrograde endocanbinoid sigling
131	phosphate	phosphate	C00009	1004	7664-38-2	J3.746J	18367	HMDB02142	H3PO4	97.9769	Inorganic compounds	Homogeneous non-metal compounds	Non-metal oxoanionic compounds	Non-metal phosphates	http://www.kegg.jp/dbget-bin/www_bget?cpd:C00009	map00190 Oxidative phosphorylation;map00195 Photosynthesis;map00550 Peptidoglycan biosynthesis;map01100 Metabolic pathways;map02010 ABC transporters;map02020 Two-component system;map04111 Cell cycle - yeast;map04978 Mineral absorption;map05012 Parkinson's disease
132	N-cyclohexylformamide 1	N-Cyclohexylformamide	C11519	13017	766-93-8	J49.655C	17945		C7H13NO	127.1					http://www.genome.jp/dbget-bin/www_bget?cpd:C11519	map00930 Caprolactam degradation ;map01120 Microbial metabolism in diverse environments
133	Benzoylformic acid 1	Benzoylformic acid	C02137	11915	611-73-4	J2.992K	18280	HMDB01587	C8H6O3	150.032	Organic Compounds	Benzenoids	Benzene and substituted derivatives	Phenylacetic acid derivatives	http://www.genome.jp/dbget-bin/www_bget?cpd:C02137	map00360 Phenylalanine metabolism ;map00627 Aminobenzoate degradation ;map01120 Microbial metabolism in diverse environments
137	Isoleucine	Isoleucine	C00407	6306	73-32-5	J44.438C	38264	HMDB33923	C6H13NO2	131.095	Organic compounds	Organic acids and derivatives	Carboxylic acids and derivatives	Amino acids, peptides, and alogues	http://www.kegg.jp/dbget-bin/www_bget?cpd:C16434
140	proline	proline	C00148	614	147-85-3	J262.841D	26271		C5H9NO2	115.063					http://www.kegg.jp/dbget-bin/www_bget?cpd:C16435
141	succinic acid	succinic acid	C00042	1110	110-15-6	J2.879G	15741	HMDB00254	C4H6O4	118.027	Organic compounds	Organic acids and derivatives	Carboxylic acids and derivatives	Dicarboxylic acids and derivatives	http://www.kegg.jp/dbget-bin/www_bget?cpd:C00042	map00020 Citrate cycle (TCA cycle);map00190 Oxidative phosphorylation;map00250 Alanine, aspartate and glutamate metabolism;map00350 Tyrosine metabolism;map00360 Phenylalanine metabolism;map00361 Chlorocyclohexane and chlorobenzene degradation;map00620 Pyruvate metabolism;map00630 Glyoxylate and dicarboxylate metabolism;map00640 Propanoate metabolism;map00650 Butanoate metabolism;map00720 Carbon f…
142	glycine 2	glycine	C00037	750	56-40-6	J1.163K	15428	HMDB00123	C2H5NO2	75.032	Organic compounds	Organic acids and derivatives	Carboxylic acids and derivatives	Amino acids, peptides, and alogues	http://www.kegg.jp/dbget-bin/www_bget?cpd:C00037	map00120 Primary bile acid biosynthesis;map00230 Purine metabolism;map00260 Glycine, serine and threonine metabolism;map00310 Lysine degradation;map00460 Cyanoamino acid metabolism;map00480 Glutathione metabolism;map00630 Glyoxylate and dicarboxylate metabolism;map00680 Methane metabolism;map00730 Thiamine metabolism;map00860 Porphyrin and chlorophyll metabolism;map00970 Aminoacyl-tR biosynthesis…
145	2,3-Dihydroxypyridine			28115	16867-04-2
146	D-Glyceric acid		C00258	752	6000-40-4	J5.966H	32398	HMDB00139	C3H6O4	106.027	Organic compounds	Organooxygen compounds	Carbohydrates and carbohydrate conjugates	Sugar acids and derivatives	http://www.kegg.jp/dbget-bin/www_bget?cpd:C00258	map00030 Pentose phosphate pathway;map00260 Glycine, serine and threonine metabolism;map00561 Glycerolipid metabolism;map00630 Glyoxylate and dicarboxylate metabolism;map00680 Methane metabolism;map01100 Metabolic pathways;map01110 Biosynthesis of secondary metabolites;map01120 Microbial metabolism in diverse environments;map01130 Biosynthesis of antibiotics;map01200 Carbon metabolism
150	2,2-Dimethylsuccinic Acid	2,2-Dimethylsuccinic Acid		11701	597-43-3
153	picolinic acid	picolinic acid	C10164	1018	98-98-6	J45.682I	28747	HMDB02243	C6H5NO2	123.032	Organic compounds	Organoheterocyclic compounds	Pyridines and derivatives	Pyridinecarboxylic acids and derivatives	http://www.kegg.jp/dbget-bin/www_bget?cpd:C10164	map00380 Tryptophan metabolism;map01100 Metabolic pathways
154	Itaconic acid	Itaconic acid	C00490	811	97-65-4	J38.149G	30838	HMDB02092	C5H6O4	130.027	Organic compounds	Lipids and lipid-like molecules	Fatty Acyls	Fatty acids and conjugates	http://www.kegg.jp/dbget-bin/www_bget?cpd:C00490	map00660 C5-Branched dibasic acid metabolism
155	uracil	uracil	C00106	1174	66-22-8	J4.842I	17568	HMDB00300	C4H4N2O2	112.027	Organic compounds	Organoheterocyclic compounds	Diazines	Pyrimidines and pyrimidine derivatives	http://www.kegg.jp/dbget-bin/www_bget?cpd:C00106	map00240 Pyrimidine metabolism;map00410 beta-Alanine metabolism;map00770 Pantothete and CoA biosynthesis;map01100 Metabolic pathways
156	Citraconic acid 4	Citraconic acid	C02226	874	498-23-7	J6.106I	17626	HMDB00634	C5H6O4	130.027	Organic compounds	Lipids and lipid-like molecules	Fatty Acyls	Fatty acids and conjugates	http://www.kegg.jp/dbget-bin/www_bget?cpd:C02226	map00290 Valine, leucine and isoleucine biosynthesis;map00660 C5-Branched dibasic acid metabolism;map01100 Metabolic pathways;map01210 2-Oxocarboxylic acid metabolism
157	fumaric acid	fumaric acid	C00122	444972	110-17-8	J2.880K	18012	HMDB00134	C4H4O4	116.011	Organic compounds	Organic acids and derivatives	Carboxylic acids and derivatives	Dicarboxylic acids and derivatives	http://www.kegg.jp/dbget-bin/www_bget?cpd:C00122	map00020 Citrate cycle (TCA cycle);map00190 Oxidative phosphorylation;map00220 Arginine biosynthesis;map00250 Alanine, aspartate and glutamate metabolism;map00350 Tyrosine metabolism;map00360 Phenylalanine metabolism;map00620 Pyruvate metabolism;map00643 Styrene degradation;map00650 Butanoate metabolism;map00720 Carbon fixation pathways in prokaryotes;map00760 Nicotite and nicotimide metabolism;m…
161	serine 1	serine	C00716	617	56-45-1	J1.195I	17115	HMDB00187	C3H7NO3	105.043	Organic compounds	Organic acids and derivatives	Carboxylic acids and derivatives	Amino acids, peptides, and alogues	http://www.kegg.jp/dbget-bin/www_bget?cpd:C00065	map00260 Glycine, serine and threonine metabolism;map00261 Monobactam biosynthesis;map00270 Cysteine and methionine metabolism;map00460 Cyanoamino acid metabolism;map00600 Sphingolipid metabolism;map00630 Glyoxylate and dicarboxylate metabolism;map00680 Methane metabolism;map00920 Sulfur metabolism;map00970 Aminoacyl-tR biosynthesis;map01060 Biosynthesis of plant secondary metabolites;map01100 Me…
165	Pyrrole-2-Carboxylic Acid		C05942	12473	634-97-9			HMDB04230			Organic compounds	Organoheterocyclic compounds	Pyrroles	Pyrrole carboxylic acids and derivatives
167	Pelargonic acid	Pelargonic acid	C01601	8158	112-05-0	J1.991G	29019	HMDB00847	C9H18O2	158.131	Organic compounds	Lipids and lipid-like molecules	Fatty Acyls	Fatty acids and conjugates	http://www.kegg.jp/dbget-bin/www_bget?cpd:C01601
169	2,3-Dimethylsuccinic acid	2,3-Dimethylsuccinic acid		11848	13545-04-5
170	phosphomycin			31669	26016-98-8
171	3-Cyanoalanine			13538	6232-19-5			HMDB60245			Organic compounds	Organic acids and derivatives	Carboxylic acids and derivatives	Amino acids, peptides, and alogues
174	L-Allothreonine 1	L-Allothreonine	C05519	99289	28954-12-3	J1.327G	28718	HMDB04041	C4H9NO3	119.058	Organic compounds	Lipids and lipid-like molecules	Fatty Acyls	Fatty acids and conjugates	http://www.kegg.jp/dbget-bin/www_bget?cpd:C05519	map00260 Glycine, serine and threonine metabolism;map01100 Metabolic pathways
175	threonine 1		C00188	205	72-19-5
179	O-acetylserine 1	O-Acetyl-L-serine	C00979	189	5147-00-2	J37.500D	17981	HMDB03011	C5H9NO4	147.053	Organic Compounds	Organic acids and derivatives	Carboxylic acids and derivatives	Amino acids, peptides, and alogues	http://www.genome.jp/dbget-bin/www_bget?cpd:C00979	map00270 Cysteine and methionine metabolism ;map00908 Zeatin biosynthesis ;map00920 Sulfur metabolism ;map01100 Metabolic pathways ;map01110 Biosynthesis of secondary metabolites ;map01120 Microbial metabolism in diverse environments ;map01130 Biosynthesis of antibiotics ;map01200 Carbon metabolism ;map01230 Biosynthesis of amino acids
180	resorcinol	Resorcinol	C01751	5054	108-46-3	J2.863K	27810	HMDB32037	C6H6O2	110.037	Organic Compounds	Benzenoids	Benzene and substituted derivatives	Phenols and derivatives	http://www.genome.jp/dbget-bin/www_bget?cpd:C01751	map00361 Chlorocyclohexane and chlorobenzene degradation ;map01120 Microbial metabolism in diverse environments
183	thymine	thymine	C00178	1135	65-71-4	J2.357D	17821	HMDB00262	C5H6N2O2	126.043	Organic compounds	Organoheterocyclic compounds	Diazines	Pyrimidines and pyrimidine derivatives	http://www.kegg.jp/dbget-bin/www_bget?cpd:C00178	map00240 Pyrimidine metabolism;map01100 Metabolic pathways
189	1,2-Cyclohexanedione 3	Cyclohexane-1,2-dione	C06105	13006	765-87-7	J75.392K	41674	HMDB31344	C6H8O2	112.052	Organic Compounds	Organooxygen compounds	Carbonyl compounds	Ketones	http://www.genome.jp/dbget-bin/www_bget?cpd:C06105	map00930 Caprolactam degradation ;map01120 Microbial metabolism in diverse environments
190	N-Ethylglycine 1	N-Ethylglycine	C11735	316542	627-01-0	J134.751I	15620	HMDB41945	C4H9NO2	103.063	Organic compounds	Organic acids and derivatives	Carboxylic acids and derivatives	Amino acids, peptides, and alogues	http://www.kegg.jp/dbget-bin/www_bget?cpd:C11735
191	3-Methylglutaric Acid	3-Methylglutaric Acid		12284	626-51-7
194	Biuret 3	Biuret	C06555	7913	108-19-0	J2.416C	181383		C2H5N3O2	103.038					http://www.kegg.jp/dbget-bin/www_bget?cpd:C06555	map00791 Atrazine degradation;map01100 Metabolic pathways;map01120 Microbial metabolism in diverse environments
197	beta-Alanine 2	beta-Alanine	C00099	239	107-95-9	J4.070C	16958	HMDB00056	C3H7NO2	89.0477	Organic compounds	Organic acids and derivatives	Carboxylic acids and derivatives	Amino acids, peptides, and alogues	http://www.kegg.jp/dbget-bin/www_bget?cpd:C00099	map00240 Pyrimidine metabolism;map00410 beta-Alanine metabolism;map00640 Propanoate metabolism;map00770 Pantothete and CoA biosynthesis;map01100 Metabolic pathways;map01110 Biosynthesis of secondary metabolites;map04080 Neuroactive ligand-receptor interaction;map04974 Protein digestion and absorption
201	3-hydroxy-L-proline 1			559314	876067			HMDB02113			Organic compounds	Organic acids and derivatives	Carboxylic acids and derivatives	Amino acids, peptides, and alogues
205	Erythrose 1			94176	583-50-6
210	Aminomalonic acid	Aminomalonic acid	C00872	100714	1068-84-4		17475	HMDB01147	C3H5NO4	119.022	Organic compounds	Organic acids and derivatives	Carboxylic acids and derivatives	Amino acids, peptides, and alogues	http://www.kegg.jp/dbget-bin/www_bget?cpd:C00872
212	3-Aminoisobutyric acid 1	3-Aminoisobutyric acid	C05145	64956	144-90-1	J79.462G	27389	HMDB03911	C4H9NO2	103.063	Organic compounds	Organic acids and derivatives	Carboxylic acids and derivatives	Amino acids, peptides, and alogues	http://www.kegg.jp/dbget-bin/www_bget?cpd:C05145
217	L-Malic acid	L-Malic acid	C00149	222656	97-67-6	J74.430A	30797	HMDB00156	C4H6O5	134.022	Organic compounds	Lipids and lipid-like molecules	Fatty Acyls	Fatty acids and conjugates	http://www.kegg.jp/dbget-bin/www_bget?cpd:C00149	map00020 Citrate cycle (TCA cycle);map00620 Pyruvate metabolism;map00630 Glyoxylate and dicarboxylate metabolism;map00680 Methane metabolism;map00710 Carbon fixation in photosynthetic organisms;map00720 Carbon fixation pathways in prokaryotes;map01060 Biosynthesis of plant secondary metabolites;map01061 Biosynthesis of phenylpropanoids;map01062 Biosynthesis of terpenoids and steroids;map01063 Bio…
220	4-Hydroxycyclohexanecarboxylic acid	trans-4-Hydroxycyclohexanecarboxylate	C04404	151138	3685-22-1	J2.638.839B	16817	HMDB01988	C7H12O3	144.079	Organic compounds	Organooxygen compounds	Alcohols and polyols	Secondary alcohols	http://www.genome.jp/dbget-bin/www_bget?cpd:C04404
221	4-Acetamidobutyric acid 1	4-Acetamidobutanoate	C02946	18189	3025-96-5	J35.110E	11951	HMDB03681	C6H11NO3	145.074	Organic Compounds	Organic acids and derivatives	Carboxylic acids and derivatives	Amino acids, peptides, and alogues	http://www.genome.jp/dbget-bin/www_bget?cpd:C02946	map00330 Arginine and proline metabolism ;map01100 Metabolic pathways
222	Threitol			169019	7493-90-5
223	5,6-dihydrouracil 1	5,6-dihydrouracil	C03919	649	504-07-4	J11.667J	15901	HMDB00076	C4H6N2O2	114.043	Organic compounds	Organoheterocyclic compounds	Diazines	Pyrimidines and pyrimidine derivatives	http://www.kegg.jp/dbget-bin/www_bget?cpd:C00429	map00240 Pyrimidine metabolism;map00410 beta-Alanine metabolism;map00770 Pantothete and CoA biosynthesis;map01100 Metabolic pathways
224	nicotinamide		C00153	936	98-92-0
227	N-Acetyl-L-leucine 1	N-Acetyl-L-leucine	C02710	70912	1188-21-2	J23.189D	17786	HMDB11756	C8H15NO3	173.105	Organic Compounds	Organic acids and derivatives	Carboxylic acids and derivatives	Amino acids, peptides, and alogues	http://www.genome.jp/dbget-bin/www_bget?cpd:C02710
228	asparagine 4	asparagine	C00155	236	70-47-3	J1.289K	22653		C4H8N2O3	132.054					http://www.kegg.jp/dbget-bin/www_bget?cpd:C16438
229	3-Hexenedioic acid	3-hexenedioic acid		107550	4436-74-2
231	aspartic acid 1	aspartic acid	C00049	424	56-84-8	J44.432D	22660		C4H7NO4	133.037					http://www.kegg.jp/dbget-bin/www_bget?cpd:C16433
233	methionine 1	methionine	C01733	876	63-68-3	J9.174J	16643	HMDB33951	C5H11NO2S	149.051	Organic compounds	Organic acids and derivatives	Carboxylic acids and derivatives	Amino acids, peptides, and alogues	http://www.kegg.jp/dbget-bin/www_bget?cpd:C00073	map00270 Cysteine and methionine metabolism;map00966 Glucosinolate biosynthesis;map00970 Aminoacyl-tR biosynthesis;map01060 Biosynthesis of plant secondary metabolites;map01070 Biosynthesis of plant hormones;map01100 Metabolic pathways;map01110 Biosynthesis of secondary metabolites;map01210 2-Oxocarboxylic acid metabolism;map01230 Biosynthesis of amino acids;map04974 Protein digestion and absorpt…
234	trans-4-hydroxy-L-proline 2	trans-4-hydroxy-L-proline	C01157	5810	51-35-4	J148.015D	18095	HMDB00725	C5H9NO3	131.058	Organic compounds	Organic acids and derivatives	Carboxylic acids and derivatives	Amino acids, peptides, and alogues	http://www.kegg.jp/dbget-bin/www_bget?cpd:C01157	map00330 Arginine and proline metabolism;map01100 Metabolic pathways
235	Cumic Acid		C06578	10820	536-66-3
236	oxoproline		C02238	7405	98-79-3
237	Cytosin		C00380	597	71-30-7
239	4-aminophenol 1	4-Aminophenol	C02372	403	123-30-8	J3.620J	17602	HMDB01169	C6H7NO	109.053	Organic Compounds	Benzenoids	Benzene and substituted derivatives	Phenols and derivatives	http://www.genome.jp/dbget-bin/www_bget?cpd:C02372	map00627 Aminobenzoate degradation ;map01120 Microbial metabolism in diverse environments
244	L-cysteine	L-cysteine	C00097	5862	52-90-4	J9.167G	17561	HMDB00574	C3H7NO2S	121.02	Organic compounds	Organic acids and derivatives	Carboxylic acids and derivatives	Amino acids, peptides, and alogues	http://www.kegg.jp/dbget-bin/www_bget?cpd:C00097	map00260 Glycine, serine and threonine metabolism;map00270 Cysteine and methionine metabolism;map00311 Penicillin and cephalosporin biosynthesis;map00332 Carbapenem biosynthesis;map00430 Taurine and hypotaurine metabolism;map00460 Cyanoamino acid metabolism;map00480 Glutathione metabolism;map00730 Thiamine metabolism;map00770 Pantothete and CoA biosynthesis;map00920 Sulfur metabolism;map00970 Ami…
246	creatine		C00300	586	57-00-1	J9.321A	16919	HMDB00064	C4H9N3O2	131.07	Organic compounds	Organic acids and derivatives	Carboxylic acids and derivatives	Amino acids, peptides, and alogues	http://www.kegg.jp/dbget-bin/www_bget?cpd:C00300	map00260 Glycine, serine and threonine metabolism;map00330 Arginine and proline metabolism;map01100 Metabolic pathways
248	Maleamate 1	Maleamate	C01596	11187	557-24-4	J53.672E	290453		C4H5NO3	115.027					http://www.kegg.jp/dbget-bin/www_bget?cpd:C01596	map00760 Nicotite and nicotimide metabolism;map01120 Microbial metabolism in diverse environments
252	6-Hydroxynicotinic acid	6-Hydroxynicotinic acid	C01020	72924	5006-66-6	J208I	16168	HMDB02658	C6H5NO3	139.027	Organic Compounds	Organoheterocyclic compounds	Pyridines and Derivatives	Pyridinecarboxylic Acids and Derivatives	http://www.genome.jp/dbget-bin/www_bget?cpd:C01020	map00760 Nicotite and nicotimide metabolism ;map01120 Microbial metabolism in diverse environments
253	Dodecanol		C02277	8193	112-53-8			HMDB11626			Organic compounds	Lipids and lipid-like molecules	Fatty Acyls	Fatty alcohols
257	3-Methylthiopropylamine	3-Methylthiopropylamine	C03354	77743	4104-45-4	J146.566J	166963		C4H11NS	105.061					http://www.kegg.jp/dbget-bin/www_bget?cpd:C03354
258	Phenylphosphoric acid	Phenolic phosphate	C02734	12793	701-64-4	J32.914B	37548		C6H7O4P	174.008					http://www.genome.jp/dbget-bin/www_bget?cpd:C02734	map00627 Aminobenzoate degradation ;map01120 Microbial metabolism in diverse environments
259	beta-Glutamic acid 1		C05574	73064	1948-48-7
262	hexadecane	hexadecane		11006	544-76-3
263	trans,trans-Muconic acid	trans,trans-Muconic acid		5356793	3588-17-8		27036	HMDB02349			Organic Compounds	Lipids and lipid-like molecules	Fatty Acyls	Fatty acids and conjugates
264	glutamic acid		C00302	611	56-86-0
268	tartaric acid	tartaric acid	C00898	875	133-37-9	J31.839F	15671	HMDB00956	C4H6O6	150.016	Organic compounds	Organooxygen compounds	Carbohydrates and carbohydrate conjugates	Sugar acids and derivatives	http://www.kegg.jp/dbget-bin/www_bget?cpd:C00898	map00630 Glyoxylate and dicarboxylate metabolism
269	toluenesulfonic acid	Toluene-4-sulfote	C06677	6101	104-15-4	J5.025C	27849	HMDB59933	C7H8O3S	172.019	Organic Compounds	Benzenoids	Benzene and substituted derivatives	Benzenesulfonic acids and derivatives	http://www.genome.jp/dbget-bin/www_bget?cpd:C06677	map00623 Toluene degradation ;map01100 Metabolic pathways ;map01120 Microbial metabolism in diverse environments ;map01220 Degradation of aromatic compounds
270	phenylalanine 1	phenylalanine	C02057	994	63-91-2	J9.175H	28044		C9H11NO2	165.079					http://www.kegg.jp/dbget-bin/www_bget?cpd:C02057
272	Lyxose 1			65550	1114-34-7
273	N-acetyl-L-aspartic acid 1	N-Acetyl-L-aspartic acid	C01042	65065	997-55-7	J62.824G	16953	HMDB00812	C6H9NO5	175.048	Organic Compounds	Organic acids and derivatives	Carboxylic acids and derivatives	Amino acids, peptides, and alogues	http://www.genome.jp/dbget-bin/www_bget?cpd:C01042	map00250 Alanine, aspartate and glutamate metabolism ;map01100 Metabolic pathways
274	lauric acid	lauric acid	C02679	3893	143-07-7	J2.548H	30805	HMDB00638	C12H24O2	200.178	Organic compounds	Lipids and lipid-like molecules	Fatty Acyls	Fatty acids and conjugates	http://www.kegg.jp/dbget-bin/www_bget?cpd:C02679	map00061 Fatty acid biosynthesis;map01100 Metabolic pathways
275	4-Hydroxyquinoline	4-Hydroxyquinoline	C06343	69141	611-36-9	J7.017C	15815		C9H7NO	145.053					http://www.genome.jp/dbget-bin/www_bget?cpd:C06343
277	ribose	ribose	C00121	993	24259-59-4	J60.867J	27476	HMDB00283	C5H10O5	150.053	Organic compounds	Organooxygen compounds	Carbohydrates and carbohydrate conjugates	Monosaccharides	http://www.kegg.jp/dbget-bin/www_bget?cpd:C08353
279	asparagine 1	asparagine	C00152	236	70-47-3	J1.289K	22653		C4H8N2O3	132.054					http://www.kegg.jp/dbget-bin/www_bget?cpd:C16438
280	taurine	taurine	C00245	1123	107-35-7	J5.056C	15891	HMDB00251	C2H7NO3S	125.015	Organic compounds	Organic acids and derivatives	Sulfonic acids and derivatives	Sulfonic acids	http://www.kegg.jp/dbget-bin/www_bget?cpd:C00245	map00120 Primary bile acid biosynthesis;map00430 Taurine and hypotaurine metabolism;map00920 Sulfur metabolism;map01100 Metabolic pathways;map02010 ABC transporters;map04080 Neuroactive ligand-receptor interaction
281	cyclohexylsulfamic acid 1	cyclohexylsulfamic acid	C02824	7533	100-88-9	J4.986G	15964	HMDB31340	C6H13NO3S	179.062	Organic compounds	Organic acids and derivatives	Sulfamic acid derivatives	Cyclamates	http://www.kegg.jp/dbget-bin/www_bget?cpd:C02824	map00930 Caprolactam degradation;map01120 Microbial metabolism in diverse environments
282	3,6-Anhydro-D-galactose 1		C06474	441040	14122-18-0
284	Ribonic acid, gamma-lactone	Ribonic acid, gamma-lactone	C01685	111064	1255190		17773		C5H10O6	166.048					http://www.genome.jp/dbget-bin/www_bget?cpd:C01685
286	glutamine 2	glutamine	C00064	5961	56-85-9	J1.279C	283003	HMDB00641	C5H10N2O3	146.069	Organic compounds	Organic acids and derivatives	Carboxylic acids and derivatives	Amino acids, peptides, and alogues	http://www.kegg.jp/dbget-bin/www_bget?cpd:C00303
287	5-Aminovaleric acid 3	5-Aminovaleric acid	C00431	138	660-88-8	J38.132B	15887	HMDB03355	C5H11NO2	117.079	Organic compounds	Organic acids and derivatives	Carboxylic acids and derivatives	Amino acids, peptides, and alogues	http://www.kegg.jp/dbget-bin/www_bget?cpd:C00431	map00310 Lysine degradation;map00330 Arginine and proline metabolism
289	ribitol	ribitol	C00474	6912	488-81-3	J6.033J	15963	HMDB00508	C5H12O5	152.069	Organic compounds	Organooxygen compounds	Carbohydrates and carbohydrate conjugates	Sugar alcohols	http://www.kegg.jp/dbget-bin/www_bget?cpd:C00474	map00040 Pentose and glucurote interconversions;map00740 Riboflavin metabolism;map01100 Metabolic pathways
291	beta-Glycerophosphoric acid	beta-Glycerophosphoric acid	C02979	2526	819-83-0	J135.242C	17270	HMDB02520	C3H9O6P	172.014	Organic Compounds	Lipids and lipid-like molecules	Glycerophospholipids	Glycerophosphates	http://www.genome.jp/dbget-bin/www_bget?cpd:C02979
292	D-Arabitol	D-Arabitol	C01904	94154	488-82-4	J12.591A	18333	HMDB00568	C5H12O5	152.069	Organic compounds	Organooxygen compounds	Carbohydrates and carbohydrate conjugates	Sugar alcohols	http://www.kegg.jp/dbget-bin/www_bget?cpd:C01904	map00040 Pentose and glucurote interconversions;map01100 Metabolic pathways
293	Methyl jasmonate 4			62388	1211-29-6
294	fucose 1			17106	2438-80-4
297	dihydrocoumarin 2	dihydrocoumarin	C02274	660	119-84-6	J36.832F	161513	HMDB36626	C9H8O2	148.052	Organic compounds	Phenylpropanoids and polyketides	3,4-dihydrocoumarins	Not Available	http://www.kegg.jp/dbget-bin/www_bget?cpd:C02274	map00624 Polycyclic aromatic hydrocarbon degradation;map01120 Microbial metabolism in diverse environments
299	Ciliatine	Ciliatine	C03557	339	2041-14-7	J13.761H		HMDB11747	C2H8NO3P	125.024	Organic Compounds	Organophosphorus Compounds	Organic Phosphonic Acids and Derivatives	Organic Phosphonic Acids	http://www.genome.jp/dbget-bin/www_bget?cpd:C03557	map00440 Phosphote and phosphite metabolism ;map01100 Metabolic pathways ;map01120 Microbial metabolism in diverse environments ;map02010 ABC transporters
300	(2R)-2-amino-3-phosphonopropanoic acid 1	(2R)-2-amino-3-phosphonopropanoic acid		177120	20263-06-3
301	flavin adenine degrad product	flavin adenine degrad product	C00016	444188	146-14-5	J39.053D	16238	HMDB01248	C27H33N9O15P2	785.157	Organic Compounds	Nucleosides, Nucleotides, and Alogues	Flavin Nucleotides			map00740 Riboflavin metabolism ;map01100 Metabolic pathways ;map01110 Biosynthesis of secondary metabolites ;map04977 Vitamin digestion and absorption
303	putrescine 2	putrescine	C02896	1045	110-60-1	J1.979H	17148	HMDB01414	C4H12N2	88.1	Organic compounds	Organonitrogen compounds	Amines	Primary amines	http://www.kegg.jp/dbget-bin/www_bget?cpd:C00134	map00330 Arginine and proline metabolism;map00480 Glutathione metabolism;map00960 Tropane, piperidine and pyridine alkaloid biosynthesis;map01060 Biosynthesis of plant secondary metabolites;map01064 Biosynthesis of alkaloids derived from ornithine, lysine and nicotinic acid;map01100 Metabolic pathways;map01110 Biosynthesis of secondary metabolites;map01130 Biosynthesis of antibiotics;map02010 ABC…
305	D-(glycerol 1-phosphate)	D-Glycerol 1-phosphate	C00093	439162	34363-28-5	J4.456C	15978		C3H9O6P	172.014					http://www.kegg.jp/dbget-bin/www_bget?cpd:C00093	map00561 Glycerolipid metabolism;map00564 Glycerophospholipid metabolism;map01100 Metabolic pathways;map01110 Biosynthesis of secondary metabolites;map02010 ABC transporters;map05231 Choline metabolism in cancer
306	Glucose-1-phosphate		C11450	65533	59-56-3
308	4-Hydroxymandelic acid	4-Hydroxymandelic acid	C11527	328	1935338	J100.348H	16388	HMDB00822	C8H8O4	168.042	Organic Compounds	Benzenoids	Benzene and substituted derivatives	Phenylacetic acid derivatives	http://www.genome.jp/dbget-bin/www_bget?cpd:C11527
312	2-deoxy-D-glucose 1	2-Deoxy-D-glucose	C00586	108223	154-17-6	J59.831C	15866		C6H12O5	164.069					http://www.genome.jp/dbget-bin/www_bget?cpd:C00586
313	O-Phosphorylethanolamine	O-Phosphorylethanolamine	C00346	1015	1071-23-4	J12.176B	17553	HMDB00224	C2H8NO4P	141.019	Organic compounds	Organophosphorus compounds	Organic phosphoric acids and derivatives	Phosphate esters	http://www.kegg.jp/dbget-bin/www_bget?cpd:C00346	map00564 Glycerophospholipid metabolism;map00600 Sphingolipid metabolism;map01100 Metabolic pathways;map01503 Cationic antimicrobial peptide (CAMP) resistance;map04071 Sphingolipid sigling pathway
315	Farnesal 2	Farnesal	C03461	68150	19317-11-4	J102.721B	15894		C15H24O	220.183					http://www.kegg.jp/dbget-bin/www_bget?cpd:C03461	map00900 Terpenoid backbone biosynthesis;map00909 Sesquiterpenoid and triterpenoid biosynthesis;map01130 Biosynthesis of antibiotics
318	azelaic acid	azelaic acid	C08261	2266	123-99-9	J10.058G	48131	HMDB00784	C9H16O4	188.105	Organic compounds	Lipids and lipid-like molecules	Fatty Acyls	Fatty acids and conjugates	http://www.kegg.jp/dbget-bin/www_bget?cpd:C08261
319	O-phosphonothreonine 3	O-phosphonothreonine	C12147	1016	1114-81-4	J203.332A	37525	HMDB11185	C4H10NO6P	199.025	Organic Compounds	Organic acids and derivatives	Carboxylic acids and derivatives	Amino acids, peptides, and alogues		map00860 Porphyrin and chlorophyll metabolism
321	citric acid	Citric acid	C00158	311	5949-29-1	J2.824J	30769	HMDB00094	C6H8O7	192.027	Organic compounds	Organic acids and derivatives	Carboxylic acids and derivatives	Tricarboxylic acids and derivatives	http://www.kegg.jp/dbget-bin/www_bget?cpd:C00158	map00020 Citrate cycle (TCA cycle);map00250 Alanine, aspartate and glutamate metabolism;map00630 Glyoxylate and dicarboxylate metabolism;map00720 Carbon fixation pathways in prokaryotes;map01060 Biosynthesis of plant secondary metabolites;map01061 Biosynthesis of phenylpropanoids;map01062 Biosynthesis of terpenoids and steroids;map01063 Biosynthesis of alkaloids derived from shikimate pathway;map…
322	shikimic acid	shikimic acid	C00493	1094	138-59-0	J3.267K	16119	HMDB03070	C7H10O5	174.053	Organic compounds	Organooxygen compounds	Alcohols and polyols	Cyclic alcohols and derivatives	http://www.kegg.jp/dbget-bin/www_bget?cpd:C00493	map00400 Phenylalanine, tyrosine and tryptophan biosynthesis;map01060 Biosynthesis of plant secondary metabolites;map01061 Biosynthesis of phenylpropanoids;map01063 Biosynthesis of alkaloids derived from shikimate pathway;map01070 Biosynthesis of plant hormones;map01100 Metabolic pathways;map01110 Biosynthesis of secondary metabolites;map01130 Biosynthesis of antibiotics;map01230 Biosynthesis of …
323	hypoxanthine 1	hypoxanthine	C00262	790	68-94-0	J1.934H	17368	HMDB00157	C5H4N4O	136.038	Organic compounds	Organoheterocyclic compounds	Imidazopyrimidines	Purines and purine derivatives	http://www.kegg.jp/dbget-bin/www_bget?cpd:C00262	map00230 Purine metabolism;map01100 Metabolic pathways
324	ornithine 1		C00077	6262	70-26-8			HMDB00214			Organic compounds	Organic acids and derivatives	Carboxylic acids and derivatives	Amino acids, peptides, and alogues
325	citrulline 1	citrulline	C00327	833	372-75-8	J5.711H	16349	HMDB00904	C6H13N3O3	175.096	Organic compounds	Organic acids and derivatives	Carboxylic acids and derivatives	Amino acids, peptides, and alogues	http://www.kegg.jp/dbget-bin/www_bget?cpd:C00327	map00220 Arginine biosynthesis;map01100 Metabolic pathways;map01110 Biosynthesis of secondary metabolites;map01130 Biosynthesis of antibiotics;map01230 Biosynthesis of amino acids
326	alpha-D-glucosamine 1-phosphate	D-Glucosamine 1-phosphate	C06156	740	2152-75-2	J1.531.908I	27625		C6H14NO8P	259.046					http://www.genome.jp/dbget-bin/www_bget?cpd:C06156	map00520 Amino sugar and nucleotide sugar metabolism ;map01100 Metabolic pathways ;map01130 Biosynthesis of antibiotics ;map04931 Insulin resistance
327	N-Acetylisatin 2	N-Acetylisatin	C02172	11321	574-17-4	J6.554D	160503		C10H7NO3	189.043					http://www.kegg.jp/dbget-bin/www_bget?cpd:C02172	map00380 Tryptophan metabolism
329	N-(3-aminopropyl)-morpholine 2			61055	123-00-2
331	Methyl-beta-D-galactopyranoside			17751029	1824-94-8
332	S-carboxymethylcysteine 2	S-Carboxymethyl-L-cysteine	C03727	1080	186537-58-6	J2.289F	16163		C5H9NO4S	179.025					http://www.genome.jp/dbget-bin/www_bget?cpd:C03727
333	glycocyamine 3	glycocyamine	C00581	763	352-97-6	J4.504G	16344	HMDB00128	C3H7N3O2	117.054	Organic compounds	Organic acids and derivatives	Carboxylic acids and derivatives	Amino acids, peptides, and alogues	http://www.kegg.jp/dbget-bin/www_bget?cpd:C00581	map00260 Glycine, serine and threonine metabolism;map00330 Arginine and proline metabolism;map01100 Metabolic pathways
334	Myristic Acid	Myristic acid	C06424	11005	544-63-8	J4.411C	28875	HMDB00806	C14H28O2	228.209	Organic Compounds	Lipids and lipid-like molecules	Fatty Acyls	Fatty acids and conjugates	http://www.genome.jp/dbget-bin/www_bget?cpd:C06424	map00061 Fatty acid biosynthesis ;map01100 Metabolic pathways
335	Tagatose 2			92092	87-81-0			HMDB03418			Organic compounds	Organooxygen compounds	Carbohydrates and carbohydrate conjugates	Monosaccharides
337	Dithioerythritol	Dithioerythritol	C00950	19001	6892-68-8	J136.609B	17456		C4H10O2S2	154.012					http://www.kegg.jp/dbget-bin/www_bget?cpd:C00950
338	fructose 1	fructose	C10906	5984	57-48-7	J4.580B	28757								http://www.kegg.jp/dbget-bin/www_bget?cpd:C01496
342	sorbose 1	sorbose	C01452	6904	3615-56-3	J4.280C	27922		C6H12O6	180.063					http://www.kegg.jp/dbget-bin/www_bget?cpd:C01452	map02060 Phosphotransferase system (PTS)
343	Atrazine-2-hydroxy 4	Hydroxyatrazine	C06552	16553	2163-68-0	J9.489G	18316		C8H15N5O	197.128					http://www.genome.jp/dbget-bin/www_bget?cpd:C06552	map00791 Atrazine degradation ;map01100 Metabolic pathways ;map01120 Microbial metabolism in diverse environments
344	Allo-inositol		C06153	892	643-10-7
345	D-Talose 1	D-Talose	C06467	99459	2595-98-4	J192.107J	28458		C6H12O6	180.063					http://www.kegg.jp/dbget-bin/www_bget?cpd:C06467
346	Benzoin 2	Benzoin	C01408	8400	119-53-9	J20.621K	176823	HMDB32039	C14H12O2	212.084					http://www.kegg.jp/dbget-bin/www_bget?cpd:C01408
347	adenine	adenine	C00147	190	73-24-5	J5.257D	16708	HMDB00034	C5H5N5	135.054	Organic compounds	Organoheterocyclic compounds	Imidazopyrimidines	Purines and purine derivatives	http://www.kegg.jp/dbget-bin/www_bget?cpd:C00147	map00230 Purine metabolism;map00908 Zeatin biosynthesis;map01100 Metabolic pathways
348	D-Altrose 1	D-Altrose	C06464	94780	1990-29-0	J14.385E	28385		C6H12O6	180.063					http://www.kegg.jp/dbget-bin/www_bget?cpd:C06464
349	D-Talose 1	D-Talose	C06467	99459	2595-98-4	J192.107J	28458		C6H12O6	180.063					http://www.kegg.jp/dbget-bin/www_bget?cpd:C06467
353	Phenaceturic acid 2		C05598	68144	500-98-1
354	4-hydroxyphenylpyruvate 1	4-Hydroxyphenylpyruvate	C01179	979	156-39-8	J101.877I	15999	HMDB00707	C9H8O4	180.042	Organic Compounds	Benzenoids	Benzene and substituted derivatives	Phenylpyruvic Acid Derivatives	http://www.genome.jp/dbget-bin/www_bget?cpd:C01179	map00130 Ubiquinone and other terpenoid-quinone biosynthesis ;map00261 Monobactam biosynthesis ;map00350 Tyrosine metabolism ;map00400 Phenylalanine, tyrosine and tryptophan biosynthesis ;map00401 Novobiocin biosynthesis ;map00680 Methane metabolism ;map00950 Isoquinoline alkaloid biosynthesis ;map01055 Biosynthesis of vancomycin group antibiotics ;map01060 Biosynthesis of plant secondary metabol…
355	galactose 2	galactose	C00124	6036	59-23-4	J4.597G	28061	HMDB00143	C6H12O6	180.063	Organic compounds	Organooxygen compounds	Carbohydrates and carbohydrate conjugates	Monosaccharides	http://www.kegg.jp/dbget-bin/www_bget?cpd:C01582
356	D-Talose 2	D-Talose	C06467	99459	2595-98-4	J192.107J	28458		C6H12O6	180.063					http://www.kegg.jp/dbget-bin/www_bget?cpd:C06467
357	Methyl Palmitoleate			643801	1120-25-8
358	L-Gulonolactone	L-Gulonolactone	C05410	439373	1128-23-0	J208.558E	17587	HMDB03466	C6H10O6	178.048	Organic Compounds	Organoheterocyclic compounds	Lactones	Gamma butyrolactones	http://www.genome.jp/dbget-bin/www_bget?cpd:C01040	map00053 Ascorbate and aldarate metabolism ;map01100 Metabolic pathways
359	lysine	lysine	C00047	5962	56-87-1	J1.280G	25094		C6H14N2O2	146.106					http://www.kegg.jp/dbget-bin/www_bget?cpd:C16440
362	sorbitol	sorbitol	D00096	5780	50-70-4	J2.299C	17924	HMDB00247	C6H14O6	182.079	Organic compounds	Organooxygen compounds	Carbohydrates and carbohydrate conjugates	Sugar alcohols	http://www.kegg.jp/dbget-bin/www_bget?cpd:C00794	map00051 Fructose and mannose metabolism;map00052 Galactose metabolism;map01100 Metabolic pathways;map02010 ABC transporters;map02060 Phosphotransferase system (PTS)
363	glucuronic acid 2	glucuronic acid	C00191	94715	1700908	J82.112H	4178	HMDB00127	C6H10O7	194.043	Organic compounds	Organooxygen compounds	Carbohydrates and carbohydrate conjugates	Sugar acids and derivatives	http://www.kegg.jp/dbget-bin/www_bget?cpd:C00191	map00040 Pentose and glucurote interconversions;map00053 Ascorbate and aldarate metabolism;map00500 Starch and sucrose metabolism;map00520 Amino sugar and nucleotide sugar metabolism;map00562 Inositol phosphate metabolism;map01100 Metabolic pathways
365	8-Aminocaprylic acid			66085	1002-57-9
366	4-hydroxycinnamic acid		C00811	637542	501-98-4
367	tyrosine 1	tyrosine	C01536	1153	60-18-4	J9.173A	17895	HMDB00158	C9H11NO3	181.074	Organic compounds	Phenylpropanoids and polyketides	Phenylpropanoic acids	Not Available	http://www.kegg.jp/dbget-bin/www_bget?cpd:C00082	map00130 Ubiquinone and other terpenoid-quinone biosynthesis;map00231 Puromycin biosynthesis;map00261 Monobactam biosynthesis;map00350 Tyrosine metabolism;map00360 Phenylalanine metabolism;map00400 Phenylalanine, tyrosine and tryptophan biosynthesis;map00401 Novobiocin biosynthesis;map00460 Cyanoamino acid metabolism;map00680 Methane metabolism;map00730 Thiamine metabolism;map00940 Phenylpropanoi…
368	o-Hydroxyhippuric acid 1	Salicyluric acid	C07588	10253	487-54-7	J54.010B	9008	HMDB00840	C9H9NO4	195.053	Organic Compounds	Benzenoids	Benzene and substituted derivatives	Benzamides	http://www.genome.jp/dbget-bin/www_bget?cpd:C07588
369	Hydantoin, 5-(4-hydroxybutyl)- 2	Hydantoin, 5-(4-hydroxybutyl)		95514	5458-06-0
370	pentadecanoic acid	pentadecanoic acid	C16537	13849	1002-84-2	J3.656K	42504	HMDB00826	C15H30O2	242.225	Organic compounds	Lipids and lipid-like molecules	Fatty Acyls	Fatty acids and conjugates	http://www.kegg.jp/dbget-bin/www_bget?cpd:C16537
372	D-galacturonic acid 2	D-Galacturonic acid	C00333	152867	685-73-4	J82.118G	12952		C6H10O7	194.043					http://www.genome.jp/dbget-bin/www_bget?cpd:C00333	map00040 Pentose and glucurote interconversions ;map00053 Ascorbate and aldarate metabolism ;map00500 Starch and sucrose metabolism ;map00520 Amino sugar and nucleotide sugar metabolism ;map01100 Metabolic pathways ;map02010 ABC transporters
378	lipoic acid	lipoic acid	C00725	6112	1077-28-7	J38.321J	16494	HMDB01451	C8H14O2S2	206.043	Organic compounds	Organoheterocyclic compounds	Dithiolanes	Lipoic acids and derivatives	http://www.kegg.jp/dbget-bin/www_bget?cpd:C00725	map01100 Metabolic pathways
379	pantothenic acid	pantothenic acid	C00864	6613	79-83-4	J4.242K	29032	HMDB00210	C9H17NO5	219.111	Organic compounds	Organic acids and derivatives	Carboxylic acids and derivatives	Amino acids, peptides, and alogues	http://www.kegg.jp/dbget-bin/www_bget?cpd:C00864	map00410 beta-Alanine metabolism;map00770 Pantothete and CoA biosynthesis;map01100 Metabolic pathways;map01110 Biosynthesis of secondary metabolites;map04977 Vitamin digestion and absorption
381	cytidine-monophosphate 1		C00055	314	63-37-6			HMDB00095			Organic compounds	Nucleosides, nucleotides, and alogues	Pyrimidine nucleotides	Pyrimidine ribonucleotides
385	palmitoleic acid	Palmitoleic acid	C08362	4668	373-49-9	J12.503B	28716	HMDB03229	C16H30O2	254.225	Organic Compounds	Lipids and lipid-like molecules	Fatty Acyls	Fatty acids and conjugates	http://www.genome.jp/dbget-bin/www_bget?cpd:C08362	map00061 Fatty acid biosynthesis
386	methyl heptadecanoate	methyl heptadecanoate		15609	1731-92-6
392	palmitic acid	palmitic acid	C00249	985	57-10-3	J1.378A	15756	HMDB00220	C16H32O2	256.24	Organic compounds	Lipids and lipid-like molecules	Fatty Acyls	Fatty acids and conjugates	http://www.kegg.jp/dbget-bin/www_bget?cpd:C00249	map00061 Fatty acid biosynthesis;map00062 Fatty acid elongation;map00071 Fatty acid degradation;map00073 Cutin, suberine and wax biosynthesis;map01040 Biosynthesis of unsaturated fatty acids;map01060 Biosynthesis of plant secondary metabolites;map01100 Metabolic pathways;map01212 Fatty acid metabolism
397	N-Acetyl-D-galactosamine 1	N-Acetyl-D-galactosamine	C01132	35717	14215-68-0	J199.634G	28037		C8H15NO6	221.09					http://www.genome.jp/dbget-bin/www_bget?cpd:C01132	map00052 Galactose metabolism ;map02060 Phosphotransferase system (PTS)
398	phenylacetaldehyde 3	phenylacetaldehyde	C00601	998	122-78-1	J2.494E	16424	HMDB06236	C8H8O	120.058	Organic compounds	Benzenoids	Benzene and substituted derivatives	Phenylacetaldehydes	http://www.kegg.jp/dbget-bin/www_bget?cpd:C00601	map00360 Phenylalanine metabolism;map00643 Styrene degradation;map01100 Metabolic pathways;map01120 Microbial metabolism in diverse environments
400	uric acid	Uric acid	C00366	1175	66-22-8	J2.372H	17775	HMDB00289	C5H4N4O3	168.028	Organic Compounds	Alkaloids and derivatives			http://www.genome.jp/dbget-bin/www_bget?cpd:C00366	map00230 Purine metabolism ;map01100 Metabolic pathways ;map01120 Microbial metabolism in diverse environments ;map04976 Bile secretion
401	ribose-5-phosphate 1	ribose-5-phosphate	C00117	77982	4151-19-3	J205.693C	17797	HMDB01548	C5H11O8P	230.019	Organic Compounds	Organooxygen compounds	Carbohydrates and carbohydrate conjugates	Monosaccharides	http://www.genome.jp/dbget-bin/www_bget?cpd:C00117	map00030 Pentose phosphate pathway;map00230 Purine metabolism;map00710 Carbon fixation in photosynthetic organisms;map01100 Metabolic pathways;map01110 Biosynthesis of secondary metabolites;map01120 Microbial metabolism in diverse environments;map01130 Biosynthesis of antibiotics;map01200 Carbon metabolism;map01230 Biosynthesis of amino acids;map04918 Thyroid hormone synthesis
402	myo-inositol	myo-inositol	C06153	892	87-89-8	J4.282J	17268	HMDB00211	C6H12O6	180.063	Organic compounds	Organooxygen compounds	Alcohols and polyols	Cyclic alcohols and derivatives	http://www.kegg.jp/dbget-bin/www_bget?cpd:C00137	map00052 Galactose metabolism;map00053 Ascorbate and aldarate metabolism;map00521 Streptomycin biosynthesis;map00562 Inositol phosphate metabolism;map01100 Metabolic pathways;map01120 Microbial metabolism in diverse environments;map01130 Biosynthesis of antibiotics;map02010 ABC transporters;map04070 Phosphatidylinositol sigling system
405	Linoleic acid methyl ester			5284421	112-63-0
407	N-Acetyl-beta-D-mannosamine 4			3084028	7772-94-3
414	guanine 1	guanine	C00242	764	73-40-5	J9.344K	16235	HMDB00132	C5H5N5O	151.049	Organic compounds	Organoheterocyclic compounds	Imidazopyrimidines	Purines and purine derivatives	http://www.kegg.jp/dbget-bin/www_bget?cpd:C00242	map00230 Purine metabolism;map01100 Metabolic pathways
416	cis-Phytol	cis-Phytol		6430833	7541-49-3
418	heptadecanoic acid	heptadecanoic acid		10465	506-12-7
419	d-Glucoheptose 2	d-Glucoheptose		219662	62475-58-5
421	Octadecanol	Stearyl alcohol (JP16/NF)	D01924	8221	112-92-5	J10.101J		HMDB02350			Organic Compounds	Lipids and lipid-like molecules	Fatty Alcohols	Fatty alcohols
428	Phytol	Phytol	C01389	5320547	150-86-7	J541.931J	17327	HMDB02019	C20H40O	296.308	Organic compounds	Lipids and lipid-like molecules	Prenol lipids	Diterpenoids	http://www.kegg.jp/dbget-bin/www_bget?cpd:C01389
432	Acenaphthenequinone 2		C02807	6724	82-86-0
433	Fructose 2,6-biphosphate degr prod 2	D-Fructose 2,6-bisphosphate	C00665	105021	79082-92-1	J470.690K	28602	HMDB01047	C6H14O12P2	339.996	Organic Compounds	Organooxygen compounds	Carbohydrates and carbohydrate conjugates	Glycosyl compounds	http://www.genome.jp/dbget-bin/www_bget?cpd:C00665	map00051 Fructose and mannose metabolism ;map04152 AMPK sigling pathway ;map04922 Glucagon sigling pathway ;map05230 Central carbon metabolism in cancer
434	spermidine 2	spermidine	C00315	1102	124-20-9	J10.054D	16610	HMDB01257	C7H19N3	145.158	Organic compounds	Organonitrogen compounds	Amines	Secondary amines	http://www.kegg.jp/dbget-bin/www_bget?cpd:C00315	map00330 Arginine and proline metabolism;map00410 beta-Alanine metabolism;map00480 Glutathione metabolism;map00940 Phenylpropanoid biosynthesis;map01100 Metabolic pathways;map02010 ABC transporters;map04976 Bile secretion
436	linoleic acid	linoleic acid	C01595	3931	60-33-3	J4.801A	17351	HMDB00673	C18H32O2	280.24	Organic compounds	Lipids and lipid-like molecules	Lineolic acids and derivatives	Not Available	http://www.kegg.jp/dbget-bin/www_bget?cpd:C01595	map00591 Linoleic acid metabolism;map01040 Biosynthesis of unsaturated fatty acids;map01060 Biosynthesis of plant secondary metabolites;map01100 Metabolic pathways
437	5-Hydroxyindole-3-acetic acid 1	5-Hydroxyindoleacetate	C05635	1826	54-16-0	J11.030B	27823	HMDB00763	C10H9NO3	191.058	Organic compounds	Organoheterocyclic compounds	Indoles and derivatives	Indolyl carboxylic acids and derivatives	http://www.kegg.jp/dbget-bin/www_bget?cpd:C05635	map00380 Tryptophan metabolism;map01100 Metabolic pathways;map04726 Serotonergic sypse
438	oleic acid	oleic acid	C00712	965	112-80-1	J2.460K	16196	HMDB00207	C18H34O2	282.256	Organic compounds	Lipids and lipid-like molecules	Fatty Acyls	Fatty acids and conjugates	http://www.kegg.jp/dbget-bin/www_bget?cpd:C00712	map00061 Fatty acid biosynthesis;map00073 Cutin, suberine and wax biosynthesis;map01040 Biosynthesis of unsaturated fatty acids;map01060 Biosynthesis of plant secondary metabolites;map04212 Longevity regulating pathway - worm
439	oleic acid	oleic acid	C00712	965	112-80-1	J2.460K	16196	HMDB00207	C18H34O2	282.256	Organic compounds	Lipids and lipid-like molecules	Fatty Acyls	Fatty acids and conjugates	http://www.kegg.jp/dbget-bin/www_bget?cpd:C00712	map00061 Fatty acid biosynthesis;map00073 Cutin, suberine and wax biosynthesis;map01040 Biosynthesis of unsaturated fatty acids;map01060 Biosynthesis of plant secondary metabolites;map04212 Longevity regulating pathway - worm
442	stearic acid	stearic acid	C01530	5281	57-11-4	J1.379J	25629	HMDB00827	C18H36O2	284.272	Organic compounds	Lipids and lipid-like molecules	Fatty Acyls	Fatty acids and conjugates	http://www.kegg.jp/dbget-bin/www_bget?cpd:C01530	map00061 Fatty acid biosynthesis;map01040 Biosynthesis of unsaturated fatty acids;map01060 Biosynthesis of plant secondary metabolites;map04745 Phototransduction - fly
446	spermidine 1	spermidine	C00315	1102	124-20-9	J10.054D	16610	HMDB01257	C7H19N3	145.158	Organic compounds	Organonitrogen compounds	Amines	Secondary amines	http://www.kegg.jp/dbget-bin/www_bget?cpd:C00315	map00330 Arginine and proline metabolism;map00410 beta-Alanine metabolism;map00480 Glutathione metabolism;map00940 Phenylpropanoid biosynthesis;map01100 Metabolic pathways;map02010 ABC transporters;map04976 Bile secretion
449	alpha-Santonin 1	alpha-Santonin	C02206	5156	481-06-1	J6.172G	16363		C15H18O3	246.126					http://www.genome.jp/dbget-bin/www_bget?cpd:C02206
450	Glucoheptonic acid 1			25588	23351-51-1
451	Methyl yellow	Methyl yellow	C03764	6053	60-11-7	J1.922D	17903	HMDB32141	C14H15N3	225.127	Organic Compounds	Organoheterocyclic compounds	Azobenzenes		http://www.genome.jp/dbget-bin/www_bget?cpd:C03764
452	fructose-6-phosphate	fructose-6-phosphate	C00085	69507	643-13-0	J92.807K	15946	HMDB00124	C6H13O9P	260.03	Organic Compounds	Organophosphorus compounds	Organic phosphoric acids and derivatives	Phosphate esters
456	Atropine	Atropine	C01479	3661	51-55-8	J231.179H	16684	HMDB14712	C17H23NO3	289.168	Organic Compounds	Benzenoids	Benzene and substituted derivatives	Phenylacetic acid derivatives	http://www.genome.jp/dbget-bin/www_bget?cpd:C01479	map00960 Tropane, piperidine and pyridine alkaloid biosynthesis ;map01110 Biosynthesis of secondary metabolites
457	glucose-6-phosphate 1	Aldohexose 6-phosphate	C03251	439958	56-73-5	J166.116G	2559		C6H13O9P	260.03					http://www.genome.jp/dbget-bin/www_bget?cpd:C03251
470	pyridoxal phosphate 2	Pyridoxal phosphate	C00018	1051	54-47-7	J10.690I	18405	HMDB01491	C8H10NO6P	247.025	Organic Compounds	Organoheterocyclic compounds	Pyridines and Derivatives	Pyridine Carboxaldehydes	http://www.genome.jp/dbget-bin/www_bget?cpd:C00018	map00750 Vitamin B6 metabolism ;map01100 Metabolic pathways ;map00730 Thiamine metabolism;map04977 Vitamin digestion and absorption
480	arachidonic acid	arachidonic acid	C00219	444899	506-32-1	J12.228I	15843	HMDB01043	C20H32O2	304.24	Organic compounds	Lipids and lipid-like molecules	Fatty Acyls	Fatty acids and conjugates	http://www.kegg.jp/dbget-bin/www_bget?cpd:C00219	map00590 Arachidonic acid metabolism;map00591 Linoleic acid metabolism;map01040 Biosynthesis of unsaturated fatty acids;map01100 Metabolic pathways;map04270 Vascular smooth muscle contraction;map04611 Platelet activation;map04664 Fc epsilon RI sigling pathway;map04666 Fc gamma R-mediated phagocytosis;map04723 Retrograde endocanbinoid sigling;map04726 Serotonergic sypse;map04730 Long-term depressi…
483	Purine riboside	Purine riboside	C01736	68368	550-33-4	J1.609H	18255	HMDB29956	C10H12N4O4	252.086	Organic Compounds				http://www.genome.jp/dbget-bin/www_bget?cpd:C01736
488	6-phosphogluconic acid	6-Phospho-D-glucote	C00345	422	53411-70-4	J1.343.743B	48928	HMDB01316	C6H13O10P	276.025	Organic Compounds	Organooxygen compounds	Carbohydrates and carbohydrate conjugates	Monosaccharides	http://www.genome.jp/dbget-bin/www_bget?cpd:C00345	map00030 Pentose phosphate pathway ;map01100 Metabolic pathways ;map01110 Biosynthesis of secondary metabolites ;map01120 Microbial metabolism in diverse environments ;map01130 Biosynthesis of antibiotics ;map01200 Carbon metabolism
490	cis-gondoic acid			5282768	5561-99-9
496	Arachidic acid	Arachidic acid	C06425	10467	506-30-9	J2.607G	28822	HMDB02212	C20H40O2	312.303	Organic Compounds	Lipids and lipid-like molecules	Fatty Acyls	Fatty acids and conjugates	http://www.genome.jp/dbget-bin/www_bget?cpd:C06425	map01040 Biosynthesis of unsaturated fatty acids
497	uridine 2	Uridine	C00299	6029	58-96-8	J4.593D	16704	HMDB00296	C9H12N2O6	244.07	Organic Compounds	Nucleosides, Nucleotides, and Alogues	Pyrimidine Nucleosides and Alogues		http://www.genome.jp/dbget-bin/www_bget?cpd:C00299	map00240 Pyrimidine metabolism ;map01100 Metabolic pathways
498	cytidine-5'-monophosphate		C00055	314	63-37-6			HMDB00095			Organic compounds	Nucleosides, nucleotides, and alogues	Pyrimidine nucleotides	Pyrimidine ribonucleotides
502	D-erythro-sphingosine 1	Sphingosine	C00319	5280335	123-78-4	J10.894D	16393	HMDB00252	C18H37NO2	299.282	Organic Compounds	Lipids and lipid-like molecules	Sphingolipids		http://www.genome.jp/dbget-bin/www_bget?cpd:C00319	map00600 Sphingolipid metabolism ;map01100 Metabolic pathways ;map04071 Sphingolipid sigling pathway ;map04210 Apoptosis
505	saccharopine 2	Saccharopine	C00449	1087	997-68-2	J7.215J	16927	HMDB00279	C11H20N2O6	276.132	Organic Compounds	Organic acids and derivatives	Carboxylic acids and derivatives	Amino acids, peptides, and alogues	http://www.genome.jp/dbget-bin/www_bget?cpd:C00449	map00300 Lysine biosynthesis ;map00310 Lysine degradation ;map01100 Metabolic pathways ;map01110 Biosynthesis of secondary metabolites ;map01130 Biosynthesis of antibiotics ;map01230 Biosynthesis of amino acids
506	5-Methoxytryptamine 2	5-Methoxytryptamine	C05659	1833	608-07-1	J7.009B	20893	HMDB04095	C11H14N2O	190.111	Organic compounds	Organoheterocyclic compounds	Indoles and derivatives	Tryptamines and derivatives	http://www.kegg.jp/dbget-bin/www_bget?cpd:C05659	map00380 Tryptophan metabolism
509	Abietic Acid 1	Abietic acid	C06087	90895	514-10-3	J10.135D	28987		C20H30O2	302.225					http://www.genome.jp/dbget-bin/www_bget?cpd:C06087	map00904 Diterpenoid biosynthesis ;map01100 Metabolic pathways ;map01110 Biosynthesis of secondary metabolites
510	DL-dihydrosphingosine 4			3126	13552-09-5
512	biotin	Biotin	C00120	253	58-85-5	J94.599D	15956	HMDB00030	C10H16N2O3S	244.088	Organic Compounds	Organoheterocyclic compounds	Biotin and derivatives		http://www.genome.jp/dbget-bin/www_bget?cpd:C00120	map00780 Biotin metabolism ;map01100 Metabolic pathways ;map02010 ABC transporters ;map04977 Vitamin digestion and absorption
519	2-Monopalmitin	2-Monopalmitin		123409	23470-00-0
520	Dioctyl phthalate	Dioctyl phthalate	C03690	8343	117-81-7	J2.909B			C24H38O4	390.277					http://www.kegg.jp/dbget-bin/www_bget?cpd:C03690
526	inosine	inosine	C00294	804	58-63-9	J1.388I	17596	HMDB00195	C10H12N4O5	268.081	Organic compounds	Nucleosides, nucleotides, and alogues	Purine nucleosides	Not Available	http://www.kegg.jp/dbget-bin/www_bget?cpd:C00294	map00230 Purine metabolism;map01100 Metabolic pathways
529	1-Monopalmitin			14900	542-44-9
531	androsterone 1	androsterone	C00523	225	53-41-8	J4.145I	16032	HMDB00031	C19H30O2	290.225	Organic compounds	Lipids and lipid-like molecules	Steroids and steroid derivatives	Androstane steroids	http://www.kegg.jp/dbget-bin/www_bget?cpd:C00523	map00140 Steroid hormone biosynthesis
532	Nicotianamine		C05324	9882882	34441-14-0
537	phytosphingosine 2	phytosphingosine	C12144	122121	554-62-1	J13.584D	46961	HMDB04610	C18H39NO3	317.293	Organic compounds	Lipids and lipid-like molecules	Sphingolipids	Not Available	http://www.kegg.jp/dbget-bin/www_bget?cpd:C12144	map00600 Sphingolipid metabolism;map01100 Metabolic pathways
541	adenosine	adenosine	C00212	191	58-61-7	J4.501B	16335	HMDB00050	C10H13N5O4	267.097	Organic compounds	Nucleosides, nucleotides, and alogues	Purine nucleosides	Not Available	http://www.kegg.jp/dbget-bin/www_bget?cpd:C00212	map00230 Purine metabolism;map01100 Metabolic pathways;map04022 cGMP-PKG sigling pathway;map04024 cAMP sigling pathway;map04071 Sphingolipid sigling pathway;map04080 Neuroactive ligand-receptor interaction;map04270 Vascular smooth muscle contraction;map04923 Regulation of lipolysis in adipocytes;map04924 Renin secretion;map05012 Parkinson's disease;map05032 Morphine addiction;map05034 Alcoholism
542	Behenic acid	Behenic acid	C08281	8215	112-85-6	J2.461I	23858	HMDB00944	C22H44O2	340.334	Organic Compounds	Lipids and lipid-like molecules	Fatty Acyls	Fatty acids and conjugates	http://www.genome.jp/dbget-bin/www_bget?cpd:C08281	map00073 Cutin, suberine and wax biosynthesis ;map01040 Biosynthesis of unsaturated fatty acids
548	spermine 4	spermine	C00750	1103	71-44-3	J5.246I	15746	HMDB01256	C10H26N4	202.216	Organic compounds	Organonitrogen compounds	Amines	Secondary amines	http://www.kegg.jp/dbget-bin/www_bget?cpd:C00750	map00330 Arginine and proline metabolism;map00410 beta-Alanine metabolism;map00480 Glutathione metabolism;map01100 Metabolic pathways;map04976 Bile secretion
549	lactose 2	lactose	C00243	493593	63-42-3	J353.435I	17716	HMDB00186	C12H22O11	342.116	Organic compounds	Organooxygen compounds	Carbohydrates and carbohydrate conjugates	Glycosyl compounds	http://www.kegg.jp/dbget-bin/www_bget?cpd:C00243	map00052 Galactose metabolism;map01100 Metabolic pathways;map02010 ABC transporters;map02060 Phosphotransferase system (PTS);map04973 Carbohydrate digestion and absorption
550	D-Fructose 1,6-bisphosphate 2	D-Fructose 1,6-bisphosphate	C00354	84951	488-69-7	J15.941G	16905	HMDB01058	C6H14O12P2	339.996	Organic Compounds	Organooxygen compounds	Monosaccharides	Pentoses	http://www.genome.jp/dbget-bin/www_bget?cpd:C00354	map00400 Phenylalanine, tyrosine and tryptophan biosynthesis ;map00680 Methane metabolism ;map00710 Carbon fixation in photosynthetic organisms ;map01110 Biosynthesis of secondary metabolites ;map01100 Metabolic pathways ;map01120 Microbial metabolism in diverse environments ;map01130 Biosynthesis of antibiotics ;map01200 Carbon metabolism ;map04152 AMPK sigling pathway ;map05230 Central carbon m…
551	2-Monoolein			5319879	3443-84-3
553	cellobiose 2	cellobiose	C06422	10712	528-50-7	J6.676A	17057		C12H22O11	342.116					http://www.kegg.jp/dbget-bin/www_bget?cpd:C00185	map00500 Starch and sucrose metabolism;map01100 Metabolic pathways;map02010 ABC transporters;map02060 Phosphotransferase system (PTS)
555	11-beta-prostaglandin-F-2-alpha 1	11-epi-Prostaglandin F2alpha	C05959	5280886	38432-87-0	J401.553	27595	HMDB11137	C20H34O5	354.241	Organic Compounds	Lipids and lipid-like molecules	Fatty Acyls	Eicosanoids	http://www.genome.jp/dbget-bin/www_bget?cpd:C05959	map00590 Arachidonic acid metabolism
556	Lactobionic Acid 3			7314	96-82-2
559	Monoolein			5283468	111-03-5
560	Monostearin		D01947	24699	123-94-4
561	4',7-dihyroxyflavanone 1	4',7-dihyroxyflavanone 1	C09762	1889	578-86-9		536636	HMDB29519	C15H12O4	256.074
562	5'-methylthioadenosine 1	5'-Methylthioadenosine	C00170	439176	2457-80-9	J22.737D	17509	HMDB01173	C11H15N5O3S	297.09	Organic Compounds	Organooxygen compounds	Carbohydrates and carbohydrate conjugates	Glycosyl compounds	http://www.genome.jp/dbget-bin/www_bget?cpd:C00170	map00270 Cysteine and methionine metabolism ;map00908 Zeatin biosynthesis ;map01060 Biosynthesis of plant secondary metabolites ;map01100 Metabolic pathways
563	Lignoceric acid	Lignoceric acid	C08320	11197	557-59-5	J11.350F	28866	HMDB02003	C24H48O2	368.365	Organic Compounds	Lipids and lipid-like molecules	Fatty Acyls	Fatty acids and conjugates	http://www.genome.jp/dbget-bin/www_bget?cpd:C08320	map01040 Biosynthesis of unsaturated fatty acids
564	Uridine monophosphate	Uridine monophosphate	C00105	5315131	58-97-9	J4.594B	16695	HMDB00288	C9H13N2O9P	324.036	Organic compounds	Nucleosides, nucleotides, and alogues	Pyrimidine nucleotides	Pyrimidine ribonucleotides	http://www.kegg.jp/dbget-bin/www_bget?cpd:C00105	map00240 Pyrimidine metabolism;map00550 Peptidoglycan biosynthesis;map01100 Metabolic pathways
567	Digalacturonic acid 2	Digalacturonic acid	C02273	439694	5894-59-7	J506.523B	28737	HMDB39721	C12H18O13	370.075	Organic compounds	Organooxygen compounds	Carbohydrates and carbohydrate conjugates	Sugar acids and derivatives	http://www.kegg.jp/dbget-bin/www_bget?cpd:C02273	map00040 Pentose and glucurote interconversions;map01100 Metabolic pathways;map02010 ABC transporters
569	Anandamide 2		C11695	5281968	94421-68-8
571	Sucrose-6-Phosphate	Sucrose 6'-phosphate	C02591	439762	36064-19-4	J1.723.920A	16308		C12H23O14P	422.082					http://www.genome.jp/dbget-bin/www_bget?cpd:C02591	map00500 Starch and sucrose metabolism ;map01100 Metabolic pathways
572	Adenosine 5-monophosphate	Adenosine 5-monophosphate		6419976	18422-05-4
