# Supplementary material for: Alteration of metabolite profiling by cold atmospheric plasma treatment in human myeloma cells
Source: Cancer Cell Int. 2018 Mar 20;18:42. doi: 10.1186/s12935-018-0541-z (PMC5859683; doi:10.1186/s12935-018-0541-z)
Supplement: Supplementary file 2 — Additional file 2: Table S2. KEGG pathway. [file 12935_2018_541_MOESM2_ESM.xlsx]

## Sheet: treatment-con
Pathway	Description	# compounds (dem)	Compounds (dem)	# compounds (all)	Compounds (all)
hsa01100	Metabolic pathways - Homo sapiens (human)	22	C00049;C00315;C00099;C00093;C00219;C00474;C00346;C00750;C00354;C01595;C01904;C00124;C00209;C00243;C01013;C00042;C06087;C00493;C02591;C12144;C02273;C01179	62	C06424;C00049;C00037;C00249;C00183;C00407;C00158;C00188;C00315;C00099;C00300;C00106;C00153;C00155;C00047;C00245;C00147;C00152;C00148;C01157;C00149;C00077;C00097;C00242;C00093;C00122;C00184;C00219;C00009;C00380;C00170;C00262;C00474;C00178;C00294;C00334;C00105;C00327;C00346;C00085;C00366;C00299;C00212;C00345;C01042;C00750;C00354;C01595;C05519;C01904;C00124;C00117;C00322;C00055;C00864;C00189;C00059;…
hsa00410	beta-Alanine metabolism - Homo sapiens (human)	5	C00049;C00315;C00099;C00750;C01013	8	C00049;C00315;C00099;C00106;C00334;C00750;C00864;C01013
hsa02010	ABC transporters - Homo sapiens (human)	5	C00049;C00315;C00093;C00243;C02273	15	C00049;C00037;C00183;C00407;C00188;C00315;C00121;C00047;C00245;C00148;C00077;C00093;C00009;C00059;C00243
hsa00640	Propanoate metabolism - Homo sapiens (human)	4	C00099;C01013;C00042;C05984	2	C00099;C01013
hsa01200	Carbon metabolism - Homo sapiens (human)	4	C00049;C00354;C01013;C00042	13	C00049;C00037;C00158;C00149;C00097;C00122;C00184;C00085;C00345;C00354;C00117;C00258;C01013
hsa00040	Pentose and glucuronate interconversions - Homo sapiens (human)	3	C00474;C01904;C02273	2	C00474;C01904
hsa00052	Galactose metabolism - Homo sapiens (human)	3	C01132;C00124;C00243	4	C01132;C00085;C00124;C00243
hsa00330	Arginine and proline metabolism - Homo sapiens (human)	3	C00315;C00750;C05942	7	C00315;C00300;C00148;C01157;C00077;C00334;C00750
hsa00400	Phenylalanine, tyrosine and tryptophan biosynthesis - Homo sapiens (human)	3	C00354;C00493;C01179	1	C00354
hsa01040	Biosynthesis of unsaturated fatty acids - Homo sapiens (human)	3	C00219;C01595;C08320	5	C00712;C00249;C01530;C00219;C01595
hsa01230	Biosynthesis of amino acids - Homo sapiens (human)	3	C00049;C00493;C01179	15	C00049;C00037;C00183;C00407;C00158;C00188;C00155;C00047;C00152;C00148;C00077;C00097;C00327;C00117;C00322
hsa05230	Central carbon metabolism in cancer - Homo sapiens (human)	3	C00049;C00354;C00042	13	C00049;C00037;C00183;C00407;C00158;C00152;C00148;C00149;C00097;C00122;C00085;C00665;C00354
hsa00240	Pyrimidine metabolism - Homo sapiens (human)	2	C00099;C01013	8	C00099;C00106;C00380;C00178;C00105;C00299;C00055;C01013
hsa00250	Alanine, aspartate and glutamate metabolism - Homo sapiens (human)	2	C00049;C00042	6	C00049;C00158;C00152;C00122;C00334;C01042
hsa00350	Tyrosine metabolism - Homo sapiens (human)	2	C00042;C01179	1	C00122
hsa00360	Phenylalanine metabolism - Homo sapiens (human)	2	C05598;C00042	2	C00122;C05598
hsa00480	Glutathione metabolism - Homo sapiens (human)	2	C00315;C00750	5	C00037;C00315;C00077;C00097;C00750
hsa00564	Glycerophospholipid metabolism - Homo sapiens (human)	2	C00093;C00346	3	C00093;C00346;C00189
hsa00591	Linoleic acid metabolism - Homo sapiens (human)	2	C00219;C01595	2	C00219;C01595
hsa00600	Sphingolipid metabolism - Homo sapiens (human)	2	C00346;C12144	1	C00346
hsa00630	Glyoxylate and dicarboxylate metabolism - Homo sapiens (human)	2	C00209;C00042	5	C00037;C00158;C00149;C00209;C00258
hsa00760	Nicotinate and nicotinamide metabolism - Homo sapiens (human)	2	C00049;C00042	4	C00049;C00153;C00122;C00334
hsa00770	Pantothenate and CoA biosynthesis - Homo sapiens (human)	2	C00049;C00099	6	C00049;C00183;C00099;C00106;C00097;C00864
hsa01210	2-Oxocarboxylic acid metabolism - Homo sapiens (human)	2	C00049;C01179	7	C00049;C00183;C00407;C00158;C00047;C00077;C00322
hsa04080	Neuroactive ligand-receptor interaction - Homo sapiens (human)	2	C00049;C00099	6	C00049;C00037;C00099;C00245;C00334;C00212
hsa04922	Glucagon signaling pathway - Homo sapiens (human)	2	C00354;C00042	6	C00158;C00149;C00122;C00085;C00665;C00354
hsa04973	Carbohydrate digestion and absorption - Homo sapiens (human)	2	C00124;C00243	2	C00124;C00243
hsa04974	Protein digestion and absorption - Homo sapiens (human)	2	C00049;C00099	10	C00049;C00037;C00183;C00407;C00188;C00099;C00047;C00152;C00148;C00097
hsa04976	Bile secretion - Homo sapiens (human)	2	C00315;C00750	3	C00315;C00366;C00750
