# Supplementary material for: Alteration of metabolite profiling by cold atmospheric plasma treatment in human myeloma cells
Source: Cancer Cell Int. 2018 Mar 20;18:42. doi: 10.1186/s12935-018-0541-z (PMC5859683; doi:10.1186/s12935-018-0541-z)
Supplement: Supplementary file 4 — Additional file 4: Table S4. Pathway analysis. [file 12935_2018_541_MOESM4_ESM.xlsx]

## Sheet: treatment-con
Pathway	Total	Hits	Raw p	-ln(p)	Holm adjust	FDR	Impact
beta-Alanine metabolism	28	5	2.0216e-05	10.809	0.0016173	0.0016173	0.40555
Propanoate metabolism	35	4	0.00089276	7.0212	0.070528	0.03571	0.08779
Arginine and proline metabolism	77	4	0.015811	4.147	1	0.42164	0.02492
Pentose and glucuronate interconversions	53	3	0.029344	3.5287	1	0.46148	0
Alanine, aspartate and glutamate metabolism	24	2	0.037161	3.2925	1	0.46148	0.26496
Sphingolipid metabolism	25	2	0.040073	3.217	1	0.46148	0.01288
Pantothenate and CoA biosynthesis	27	2	0.046148	3.0759	1	0.46148	0.07286
Phenylalanine, tyrosine and tryptophan biosynthesis	27	2	0.046148	3.0759	1	0.46148	0.0984
Glutathione metabolism	38	2	0.084743	2.4681	1	0.70217	0.07064
Glycerophospholipid metabolism	39	2	0.088626	2.4233	1	0.70217	0.10384
Galactose metabolism	41	2	0.096548	2.3377	1	0.70217	0.25586
Phenylalanine metabolism	45	2	0.11297	2.1806	1	0.75316	0
Glyoxylate and dicarboxylate metabolism	50	2	0.13445	2.0066	1	0.82738	0.12894
Linoleic acid metabolism	15	1	0.17718	1.7306	1	1	0.65625
Cyanoamino acid metabolism	16	1	0.18784	1.6722	1	1	0
Citrate cycle (TCA cycle)	20	1	0.22917	1.4733	1	1	0.01446
Riboflavin metabolism	21	1	0.23918	1.4305	1	1	0
Tyrosine metabolism	76	2	0.25616	1.362	1	1	0.04218
Lysine biosynthesis	32	1	0.34132	1.0749	1	1	0
Glycerolipid metabolism	32	1	0.34132	1.0749	1	1	0.00714
Ubiquinone and other terpenoid-quinone biosynthesis	36	1	0.37507	0.98065	1	1	0.04886
Nitrogen metabolism	39	1	0.39927	0.91812	1	1	0.00067
Butanoate metabolism	40	1	0.40713	0.89862	1	1	0.01774
Histidine metabolism	44	1	0.43761	0.82644	1	1	0
Nicotinate and nicotinamide metabolism	44	1	0.43761	0.82644	1	1	0
Glycine, serine and threonine metabolism	48	1	0.46656	0.76237	1	1	0
Starch and sucrose metabolism	50	1	0.48049	0.73295	1	1	0
Cysteine and methionine metabolism	56	1	0.5202	0.65354	1	1	0
Pyrimidine metabolism	60	1	0.54503	0.60692	1	1	0
Arachidonic acid metabolism	62	1	0.55697	0.58524	1	1	0.21669
Aminoacyl-tRNA biosynthesis	75	1	0.62752	0.46598	1	1	0.05634
Tryptophan metabolism	79	1	0.64695	0.43549	1	1	0
Amino sugar and nucleotide sugar metabolism	88	1	0.68714	0.37522	1	1	0
Steroid hormone biosynthesis	99	1	0.73028	0.31433	1	1	0.00388
